# Supplementary material for: Structure-aided ACEI-capped remdesivir-loaded novel PLGA nanoparticles: toward a computational simulation design for anti-SARS-CoV-2 therapy
Source: Royal Society of Chemistry journal article supplement (doi:10.1039/d0cp04389c), 2020-01-01
Supplement: d0cp04389c1.pdf [file d0cp04389c1.pdf]

Supporting Information

**Structure-aided ACEI-capping remdesivir loaded novel PLGA nanoparticles:  
Toward a computational simulation design to anti-SARS-CoV-2 therapy**

**Author:** Juanping Wu<sup>1,\*</sup>, Hongmei Wang<sup>1</sup>, Bingyu Li<sup>2,\*</sup>

**Affiliation:**

<sup>1</sup>Department of Pharmacy, First Hospital of Huzhou, First Affiliated Hospital of Huzhou University, Huzhou, Zhejiang, P. R. China

<sup>2</sup>State Key Laboratory of Supramolecular Structure and Materials, Institute of Theoretical Chemistry, Jilin University, Changchun 130021, China

**\*Corresponding Author:**

Deputy director, Juanping Wu Ph.D

Department of Pharmacy, First Hospital of Huzhou, First Affiliated Hospital of Huzhou University, Huzhou, Zhejiang, P. R. China

E-mail:stephenaosen@163.com

Dr. Bingyu Li Ph.D

State Key Laboratory of Supramolecular Structure and Materials, Institute of Theoretical Chemistry, Jilin University, Changchun 130021, China

E-mail:

lby16@mails.jlu.edu.cn

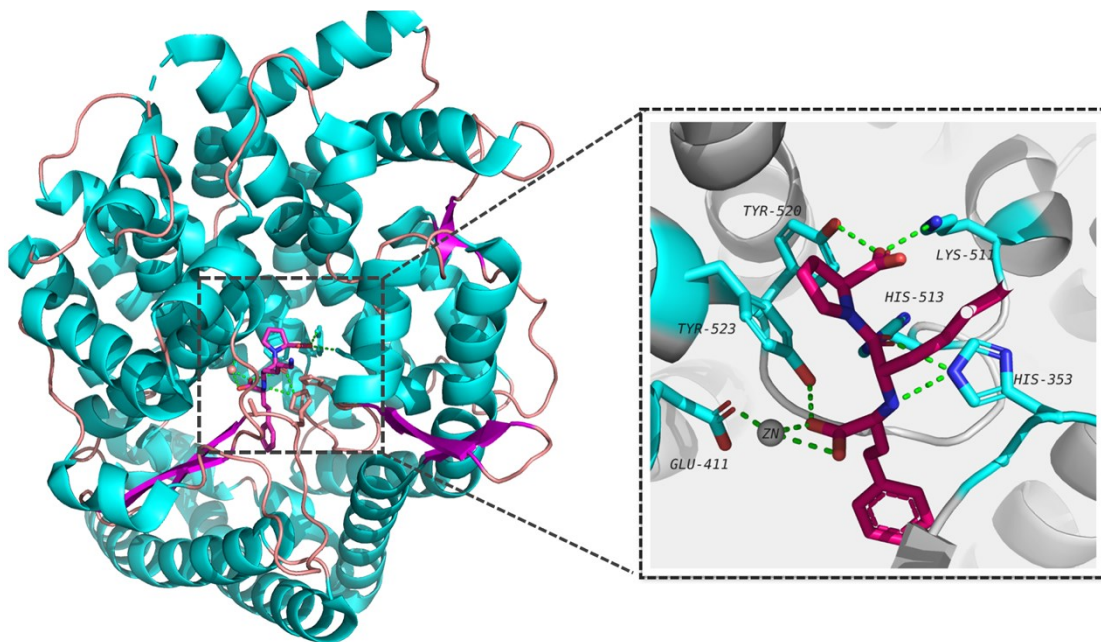

**Figure S1.** One representative 3D conformation of lisinopril and ACE protein based on molecular docking. Hydrogen bond interactions represented in green dashes.

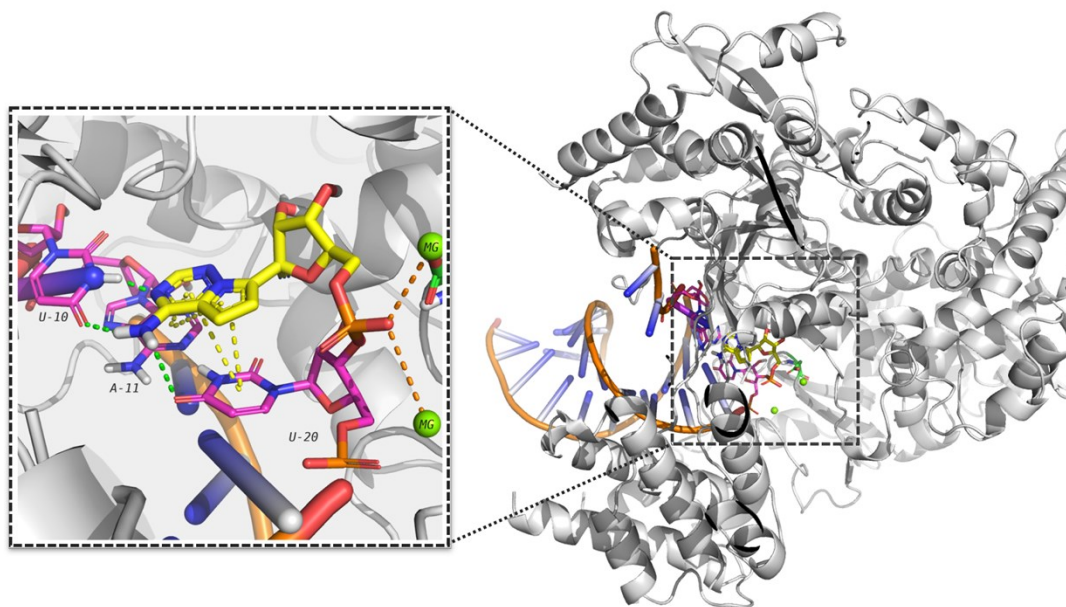

**Figure S2.** One representative 3D conformation of remdesivir and RdRp protein based on molecular docking. Hydrogen bond interactions represented in green dashes. And the  $\pi$ - $\pi$  stacking interactions represented in yellow dashes.

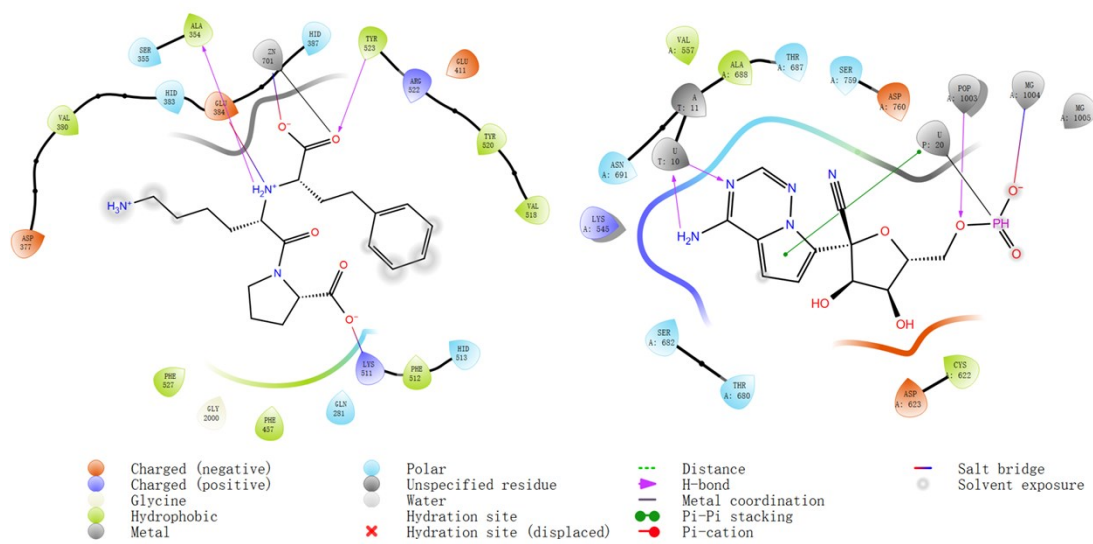

**Figure S3.** Both representative 2D interactions between lisinopril and ACE protein (Left), as well as remdesivir and RdRp protein (Right) based on molecular docking.

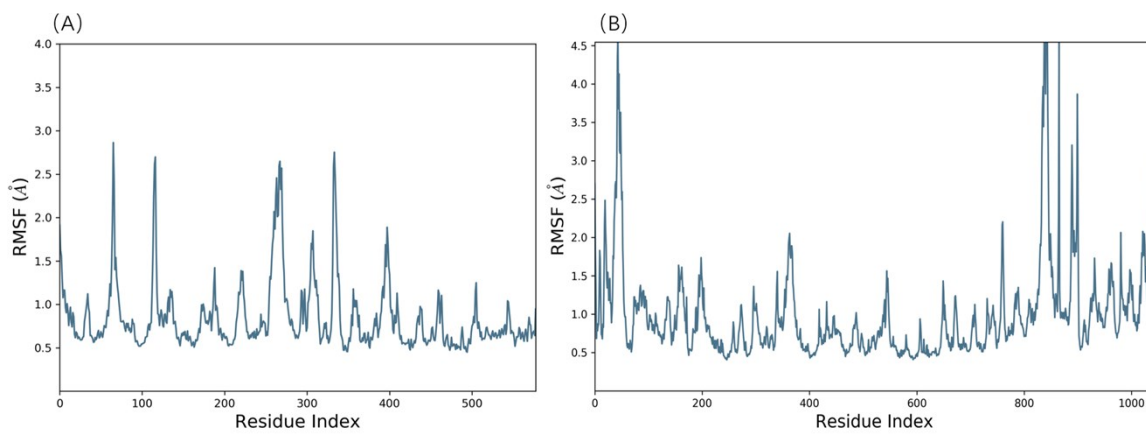

**Figure S4.** RMSF plots of ACE protein (A) and RdRp protein (B) based on MD simulations.

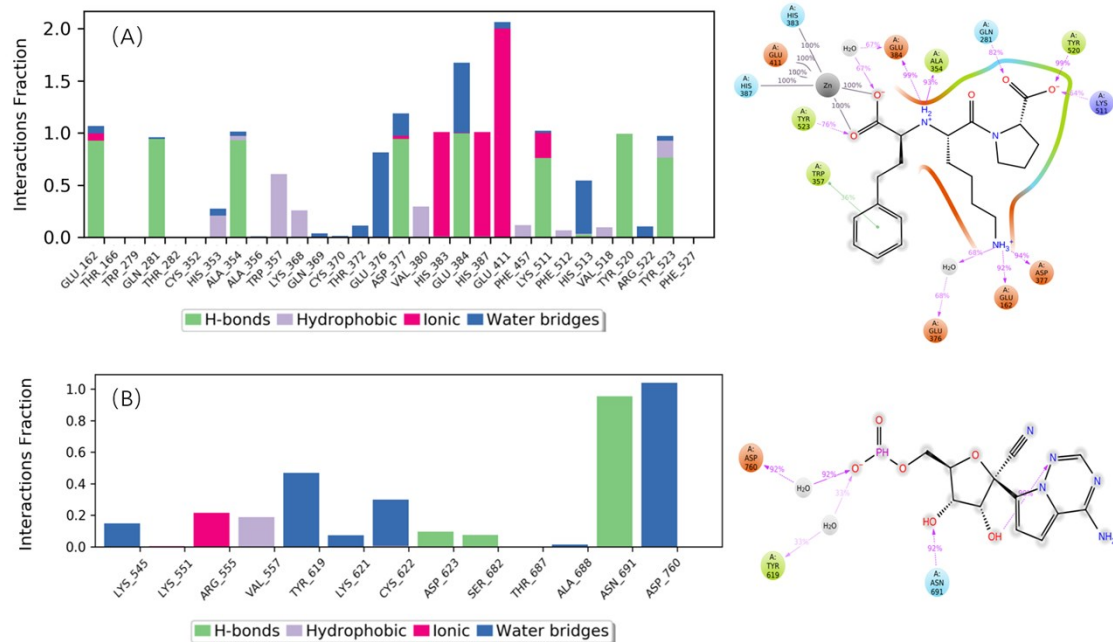

**Figure S5.** Protein-ligand contacts are monitored during the whole MD simulations. (A) Interaction fraction of lisinopril-ACE complex. (B) Interaction fraction of remdesivir - RdRp complex.

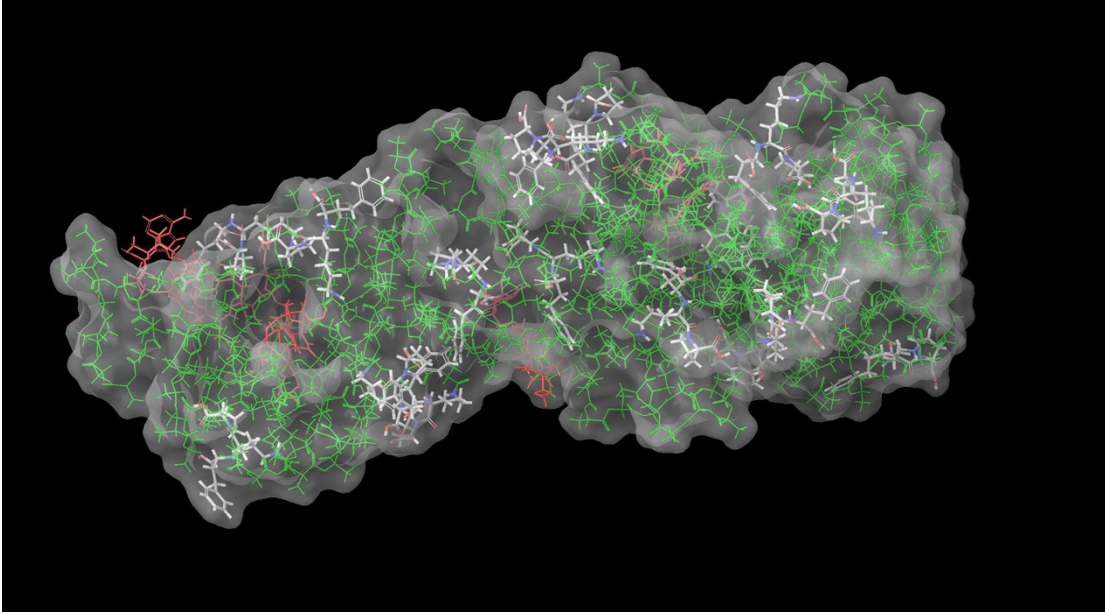

**Figure S6.** MD simulations of lisinopril-containing PLGA polymers interacting with remdesivir molecules. Red represented remdesivir molecules; white-blue-red represented lisinopril molecules, and green represented PLGA polymer molecule.

**Table S1. The interaction parameters between different kinds of beads.**

|   | W  | L  | P   | R   |
|---|----|----|-----|-----|
| W | 25 | 27 | 100 | 100 |
| L |    | 25 | 100 | 100 |
| P |    |    | 25  | 27  |
| R |    |    |     | 25  |



**Table S2. The Molar Mass and the Volume Fraction of the Four Types of CG Beads.**

| Bead type            | W  | R      | L      | P      |
|----------------------|----|--------|--------|--------|
| M(g/mol)             | 18 | 602.58 | 405.49 | 996.78 |
| (g/cm <sup>3</sup> ) | 1  | 1.47   | 1.251  | 1.2295 |
